# Supplementary material
Source: MDPI journal article supplement (https://www.mdpi.com/2311-7524/8/12/1186)
Supplement: s1 [file s1]

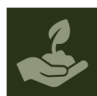

## Supplementary Materials

Table S1. Overview of Sarcococca genotypes under field evaluation

| Genotype                                                                             | Experiment | # seedlings manually measured |
|--------------------------------------------------------------------------------------|------------|-------------------------------|
| <i>S. ruscifolia</i> var. <i>chinensis</i> x <i>S. confusa</i> (S1)                  | SarcoE2    | 63                            |
| <i>S. ruscifolia</i> var. <i>chinensis</i> x <i>S. wallichii</i>                     | SarcoE2    | 4                             |
| <i>S. saligna</i> (S10) x <i>S. hookeriana</i> var. <i>digyna</i>                    | SarcoE2    | 119                           |
| <i>S. ruscifolia</i> var. <i>chinensis</i> ‘Dragon Gate’ x <i>S. confusa</i> (S1)    | SarcoE2    | 3                             |
| <i>S. hookeriana</i> var. <i>digyna</i> x <i>S. saligna</i> (S4)                     | SarcoE2    | 4                             |
| <i>S. hookeriana</i> var. <i>digyna</i> x <i>S. confusa</i> (S1)                     | SarcoE2    | 5                             |
| <i>S. hookeriana</i> var. <i>digyna</i> x <i>S. ruscifolia</i> var. <i>chinensis</i> | SarcoE2    | 3                             |
| <i>S. hookeriana</i> var. <i>humilis</i> x <i>S. hookeriana</i> var. <i>digyna</i>   | SarcoE2    | 8                             |
| <i>S. confusa</i> (S1) open pollination                                              | SarcoE2    | 159                           |
| <i>S. orientalis</i> (S3) open pollination                                           | SarcoE2    | 3                             |
| <i>S. humilis</i> open pollination                                                   | SarcoE2    | 2                             |
| <i>S. confusa</i> (S12) open pollination                                             | SarcoE2    | 136                           |
| <i>S. ruscifolia</i> var. <i>chinensis</i> ‘Dragon Gate’ open pollination            | SarcoE2    | 4                             |
| <i>S. hookeriana</i> var. <i>humilis</i> open pollination                            | SarcoE2    | 6                             |
| <i>S. orientalis</i> (S11) open pollination                                          | SarcoE2    | 53                            |
| <i>S. saligna</i> (S10) open pollination                                             | SarcoE2    | 2                             |
| <i>S. ruscifolia</i> var. <i>chinensis</i> open pollination                          | SarcoE2    | 8                             |
| <i>S. saligna</i> (S4) open pollination                                              | SarcoE2    | 2                             |
| <i>S. confusa</i> (S1) open pollination                                              | SarcoE1    | 10                            |
| <i>S. orientalis</i> (S3) open pollination                                           | SarcoE1    | 10                            |
| <i>S. saligna</i> (S4) open pollination                                              | SarcoE1    | 16                            |
| <i>S. ruscifolia</i> var. <i>chinensis</i> open pollination                          | SarcoE1    | 7                             |
| <i>S. ruscifolia</i> var. <i>chinensis</i> ‘Dragon Gate’ open pollination            | SarcoE1    | 10                            |
| <i>S. hookeriana</i> var. <i>digyna</i> open pollination                             | SarcoE1    | 12                            |
| <i>S. hookeriana</i> var. <i>humilis</i> open pollination                            | SarcoE1    | 30                            |

**Table S2.** Overview of the phenotypic parameters for Sarcococca and rose experiments

| Data source            | Abbreviation      | Description                                 | Sarcococca | Rose |
|------------------------|-------------------|---------------------------------------------|------------|------|
| On-ground measurements | GR_Hmax           | Maximum plant height                        | x          | x    |
|                        | GR_Hmean          | Average plant height                        | x          |      |
|                        | GR_W1 and GR_W2   | Plant width in two perpendicular directions | x          |      |
|                        | GR_Area           | Plant area calculated as GR_W1*GR_W2        | x          |      |
|                        | GR_Hratio         | GR_Hmax/GR_Hmean                            | x          |      |
|                        | GR_Wratio         | GR_W1/GR_W2                                 | x          |      |
|                        | GR_U              | Uniformity scoring                          |            | x    |
|                        | GR_BSS            | Black spot leaf spot scoring                |            | x    |
|                        | GR_BSD            | Black spot leaf drop scoring                |            | x    |
|                        | GR_FIA            | Flower abundance                            |            | x    |
|                        | GR_FIC            | Flowering continuity                        |            | x    |
| UAV imagery            | UAV_HQ90          | 90 <sup>th</sup> quantile plant height      | x          | x    |
|                        | UAV_Hmean         | Mean plant height                           | x          |      |
|                        | UAV_B1 and UAV_B2 | Surrounding box widths                      | x          |      |
|                        | UAV_Area          | Plant area (top view)                       | x          |      |
|                        | UAV_BoxArea       | Plant area calculated as UAV_B1xUAV_B2      | x          |      |
|                        | UAV_ExG           | Excess green mean value                     |            | x    |
|                        | UAV_Hratio        | UAV_HQ90/UAV_Hmean                          | x          |      |
|                        | UAV_Bratio        | UAV_B1/UAV_B2                               | x          |      |
|                        | UAV_Hcv           | Plant height coefficient of variation       | x          | x    |
|                        | UAV_CC            | Canopy height                               |            | x    |

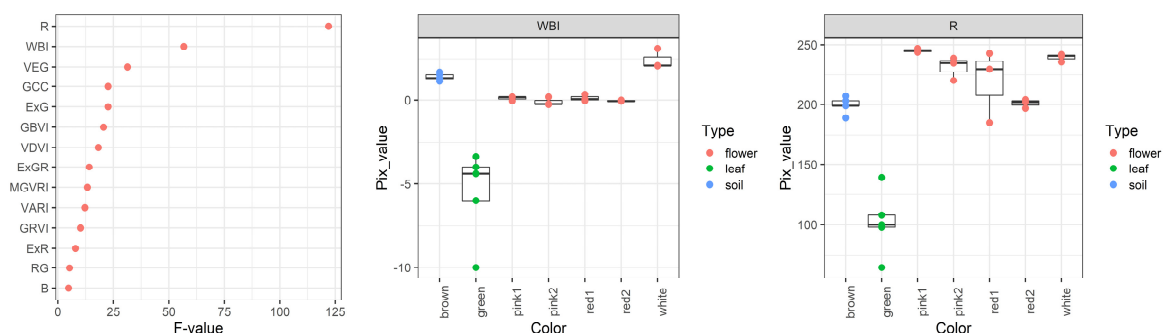**Figure S1.** Evaluation of spectral bands and vegetation indices to separate colors. Separation of the colors by the index with the highest F-value (WBI).

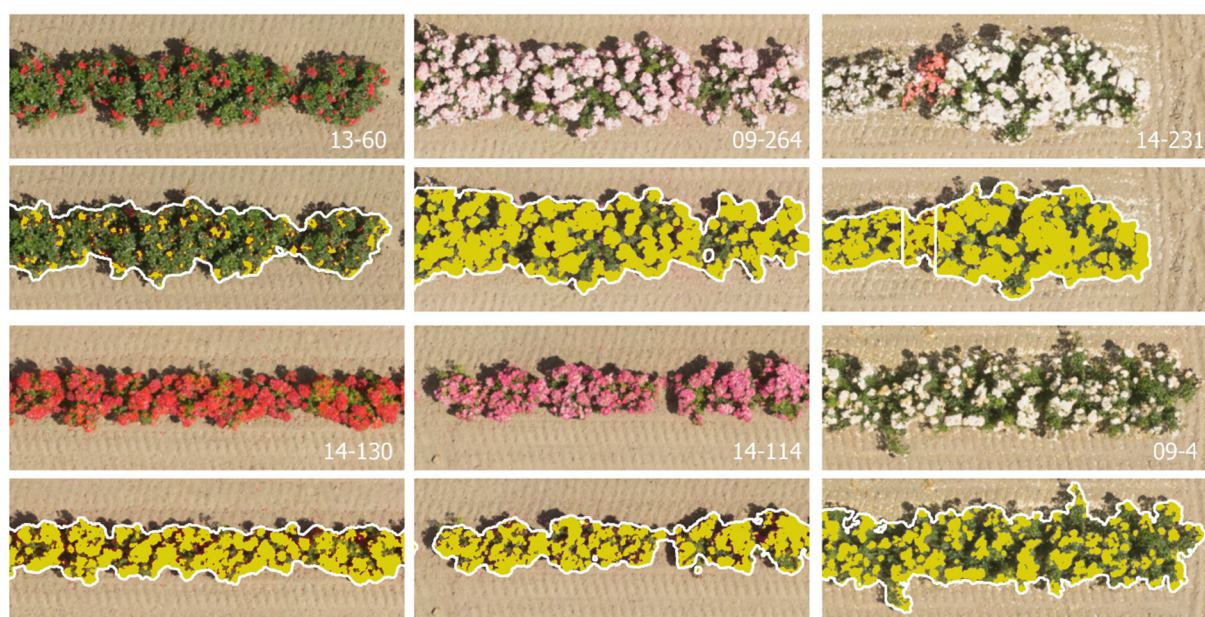

**Figure S2.** Flight July 1st, examples of genotypes with different flower colors with classification of pixels as flower marked in yellow and bush area delimited in white in roses.

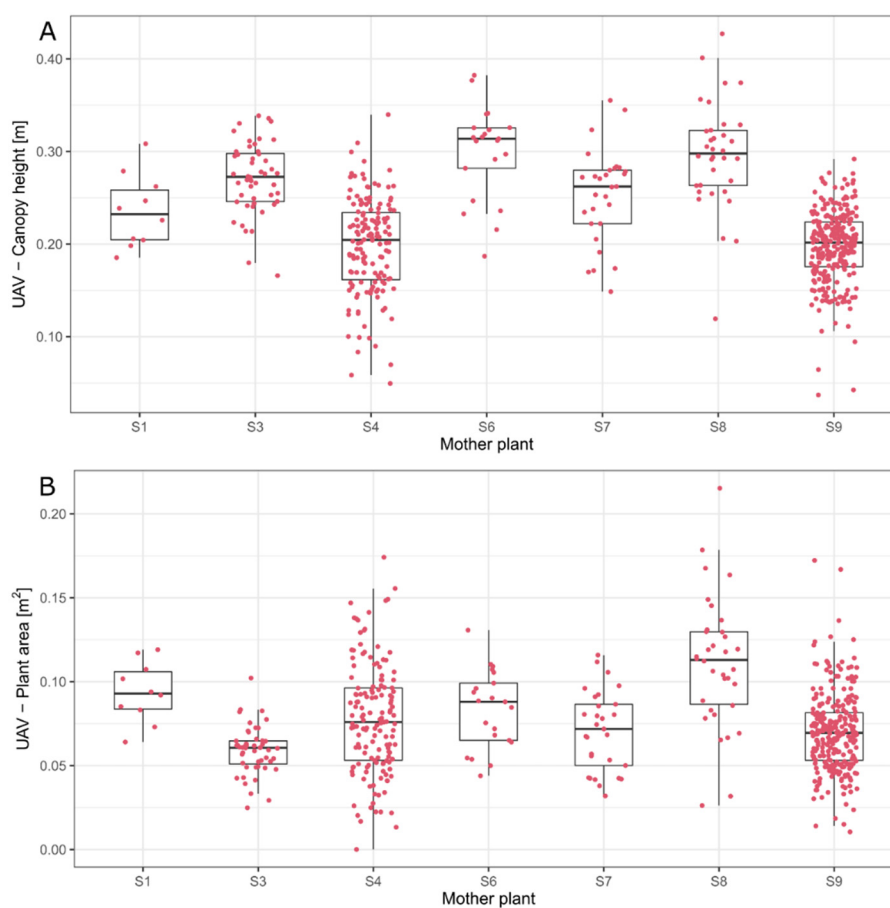

**Figure S3.** Boxplots per mother plant of all *Sarcococca* plants in SarcoE1 for (A) canopy height and (B) plant area. Every dot corresponds to a plant.

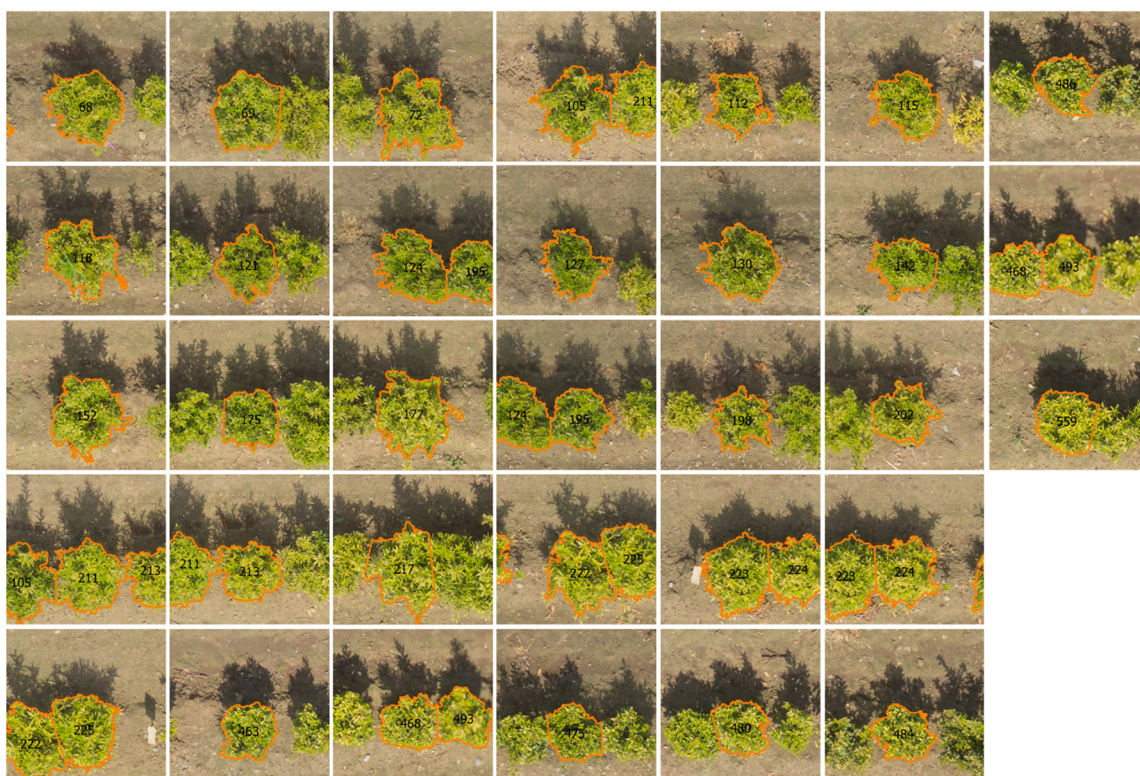

**Figure S4.** UAV plants selected according to "ideal" plant selection criteria (central part of the image) in *Sarcococca*
